# Supplementary material for: The Mechanism of Aidi Injection on Breast Cancer Based on Network Pharmacologyanalysis
Source: Research Square preprint supplement (doi:10.21203/rs.3.rs-85981/v1), 2020-10-08
Supplement: Supplementary file 1 [file c85da711b24742448898db16.xlsx]

## Sheet: KEGG analysis
ID	Term	Count	%	PValue	Genes	List Total	Pop Hits	Pop Total	Fold Enrichment	Bonferroni	Benjamini	FDR
KEGG : 0 5200	Pathways in cancer	30	0.176824	5.19485e-17	FGFR2, FGFR1, PPARD, PPARG, MMP2, AKT1, CDC42, IGF1R, CASP3, RHOA, RARA, RARB, FGF1, EGFR, PIK3CG, AR, BMP2, HSP90AA1, MAP2K1, BRAF, TGFBR1, MET, IGF1, MAPK10, CTNNA1, CDK2, MAPK1, MDM2, MAPK8, ABL1	82	384	7001	6.67016	9.24683e-15	9.24683e-15	6.38681e-14
KEGG : 0 5205	Proteoglycans in cancer	22	0.129671	1.40972e-15	PIK3CG, EGFR, FGFR1, ERBB4, BRAF, MAP2K1, MET, ESR1, IGF1, MMP2, SRC, KDR, PTPN11, AKT1, CDC42, IGF1R, MAPK1, CASP3, MAPK14, RHOA, MDM2, PLAU	82	190	7001	9.88588	2.56906e-13	1.28453e-13	1.77636e-12
KEGG : 0 4914	Progesterone-mediated oocyte maturation	15	0.0884121	6.63384e-13	PIK3CG, HSP90AA1, MAP2K1, BRAF, IGF1, MAPK10, CDK2, PGR, AKT1, IGF1R, MAPK1, PLK1, MAPK14, MAPK8, CCNA2	82	87	7001	14.7204	1.18078e-10	3.93593e-11	8.1557e-10
KEGG : 0 4068	FoxO signaling pathway	17	0.1002	1.3648e-12	PIK3CG, EGFR, MAP2K1, BRAF, TGFBR1, IGF1, MAPK10, CDK2, SOD2, AKT1, IGF1R, MAPK1, PLK1, MAPK14, MDM2, MAPK8, INSR	82	133	7001	10.913	2.42934e-10	6.07334e-11	1.67795e-09
KEGG : 0 4014	Ras signaling pathway	20	0.117883	3.49377e-12	FGFR2, PIK3CG, EGFR, FGFR1, MAP2K1, MET, IGF1, MAPK10, KDR, PTPN11, AKT1, CDC42, IGF1R, MAPK1, TEK, RHOA, MAPK8, FGF1, ABL1, INSR	82	220	7001	7.76164	6.21889e-10	1.24378e-10	4.29541e-09
KEGG : 0 5215	Prostate cancer	14	0.082518	9.33995e-12	PIK3CG, EGFR, FGFR2, FGFR1, AR, HSP90AA1, MAP2K1, BRAF, IGF1, CDK2, AKT1, IGF1R, MAPK1, MDM2	82	85	7001	14.0623	1.66252e-09	2.77086e-10	1.1483e-08
KEGG : 0 4015	Rap1 signaling pathway	19	0.111989	1.16292e-11	FGFR2, PIK3CG, EGFR, FGFR1, BRAF, MAP2K1, MET, IGF1, SRC, KDR, AKT1, CDC42, IGF1R, MAPK1, MAPK14, TEK, RHOA, FGF1, INSR	82	206	7001	7.87467	2.07001e-09	2.95715e-10	1.42976e-08
KEGG : 0 5218	Melanoma	12	0.0707297	2.23e-10	AKT1, EGFR, PIK3CG, FGFR1, MAPK1, IGF1R, MAP2K1, BRAF, MET, IGF1, MDM2, FGF1	82	68	7001	15.0667	3.96941e-08	4.96176e-09	2.74168e-07
KEGG : 0 4520	Adherens junction	12	0.0707297	3.62259e-10	EGFR, FGFR1, MAPK1, IGF1R, CDC42, TGFBR1, MET, RHOA, PTPN1, CTNNA1, INSR, SRC	82	71	7001	14.4301	6.44821e-08	7.16468e-09	4.45379e-07
KEGG : 0 4917	Prolactin signaling pathway	11	0.0648356	3.04144e-09	AKT1, PIK3CG, MAPK1, MAP2K1, MAPK14, ESR1, MAPK8, JAK2, ESR2, MAPK10, SRC	82	66	7001	14.2297	5.41377e-07	5.41377e-08	3.7393e-06
KEGG : 0 4151	PI3K-Akt signaling pathway	19	0.111989	2.08278e-08	FGFR2, PIK3CG, EGFR, FGFR1, HSP90AA1, MAP2K1, MET, IGF1, CDK2, KDR, AKT1, IGF1R, MAPK1, TEK, MDM2, JAK2, FGF1, INSR, IL2	82	326	7001	4.97602	3.70735e-06	3.37032e-07	2.56068e-05
KEGG : 0 4510	Focal adhesion	15	0.0884121	3.29414e-08	AKT1, EGFR, PIK3CG, MAPK1, IGF1R, CDC42, BRAF, MAP2K1, MET, RHOA, IGF1, MAPK8, MAPK10, SRC, KDR	82	193	7001	6.6356	5.86355e-06	4.88631e-07	4.04998e-05
KEGG : 0 5212	Pancreatic cancer	10	0.0589414	3.36991e-08	AKT1, EGFR, PIK3CG, MAPK1, CDC42, MAP2K1, BRAF, TGFBR1, MAPK8, MAPK10	82	63	7001	13.5521	5.99842e-06	4.61418e-07	4.14313e-05
KEGG : 0 4012	ErbB signaling pathway	11	0.0648356	3.77991e-08	AKT1, EGFR, PIK3CG, MAPK1, MAP2K1, ERBB4, BRAF, MAPK8, MAPK10, ABL1, SRC	82	85	7001	11.0489	6.72822e-06	4.80589e-07	4.64721e-05
KEGG : 0 5210	Colorectal cancer	10	0.0589414	6.697e-08	AKT1, PIK3CG, MAPK1, CASP3, MAP2K1, BRAF, TGFBR1, RHOA, MAPK8, MAPK10	82	68	7001	12.5556	1.19206e-05	7.9471e-07	8.23362e-05
KEGG : 0 4722	Neurotrophin signaling pathway	12	0.0707297	8.7557e-08	AKT1, PIK3CG, MAPK1, CDC42, MAP2K1, BRAF, MAPK14, RHOA, MAPK8, MAPK10, ABL1, PTPN11	82	118	7001	8.68251	1.5585e-05	9.74071e-07	0.000107647
KEGG : 0 4010	MAPK signaling pathway	16	0.0943063	9.23511e-08	FGFR2, EGFR, FGFR1, MAP2K1, BRAF, TGFBR1, MAPK10, AKT1, CDC42, MAPK1, CASP3, MAPK14, MAPK8, FGF1, HSPA8, PPP5C	82	244	7001	5.59856	1.64384e-05	9.6697e-07	0.000113541
KEGG : 0 4915	Estrogen signaling pathway	11	0.0648356	1.22992e-07	AKT1, EGFR, PIK3CG, MAPK1, HSP90AA1, MAP2K1, ESR1, ESR2, MMP2, HSPA8, SRC	82	96	7001	9.7829	2.18923e-05	1.21625e-06	0.000151212
KEGG : 0 5214	Glioma	9	0.0530473	4.05311e-07	AKT1, EGFR, PIK3CG, MAPK1, IGF1R, MAP2K1, BRAF, IGF1, MDM2	82	61	7001	12.5968	7.21427e-05	3.79712e-06	0.000498308
KEGG : 0 5220	Chronic myeloid leukemia	9	0.0530473	1.0681e-06	AKT1, PIK3CG, MAPK1, MAP2K1, BRAF, TGFBR1, MDM2, ABL1, PTPN11	82	69	7001	11.1363	0.000190104	9.50604e-06	0.00131317
KEGG : 0 4550	Signaling pathways regulating pluripotency of stem cells	11	0.0648356	2.11587e-06	AKT1, FGFR2, PIK3CG, FGFR1, MAPK1, IGF1R, BMP2, MAP2K1, MAPK14, IGF1, JAK2	82	130	7001	7.2243	0.000376554	1.79343e-05	0.00260132
KEGG : 0 4370	VEGF signaling pathway	8	0.0471531	3.99088e-06	AKT1, PIK3CG, MAPK1, CDC42, MAP2K1, MAPK14, SRC, KDR	82	58	7001	11.7763	0.000710126	3.22894e-05	0.00490648
KEGG : 0 5219	Bladder cancer	7	0.041259	4.08716e-06	EGFR, MAPK1, MAP2K1, BRAF, MDM2, MMP2, SRC	82	38	7001	15.7275	0.000727251	3.16306e-05	0.00502484
KEGG : 0 4912	GnRH signaling pathway	9	0.0530473	5.29543e-06	EGFR, MAPK1, CDC42, MAP2K1, MAPK14, MAPK8, MAPK10, MMP2, SRC	82	85	7001	9.04003	0.000942145	3.92738e-05	0.00651027
KEGG : 0 5230	Central carbon metabolism in cancer	8	0.0471531	6.28964e-06	AKT1, FGFR2, EGFR, PIK3CG, FGFR1, MAPK1, MAP2K1, MET	82	62	7001	11.0165	0.00111893	4.47814e-05	0.00773252
KEGG : 0 5211	Renal cell carcinoma	8	0.0471531	7.79863e-06	AKT1, PIK3CG, MAPK1, CDC42, MAP2K1, BRAF, MET, PTPN11	82	64	7001	10.6723	0.0013872	5.33894e-05	0.0095876
KEGG : 0 5161	Hepatitis B	11	0.0648356	8.17794e-06	AKT1, PIK3CG, MAPK1, CASP3, MAP2K1, TGFBR1, MAPK8, MAPK10, CCNA2, CDK2, SRC	82	151	7001	6.21959	0.00145462	5.39126e-05	0.0100539
KEGG : 0 4066	HIF-1 signaling pathway	9	0.0530473	1.42191e-05	AKT1, EGFR, PIK3CG, MAPK1, IGF1R, MAP2K1, TEK, IGF1, INSR	82	97	7001	7.92167	0.00252782	9.03895e-05	0.0174803
KEGG : 0 5213	Endometrial cancer	7	0.041259	1.87089e-05	AKT1, EGFR, PIK3CG, MAPK1, MAP2K1, BRAF, CTNNA1	82	49	7001	12.1969	0.00332468	0.000114829	0.0229993
KEGG : 0 4380	Osteoclast differentiation	10	0.0589414	2.01595e-05	AKT1, PIK3CG, MAPK1, CTSK, MAP2K1, MAPK14, TGFBR1, PPARG, MAPK8, MAPK10	82	133	7001	6.4194	0.003582	0.000119607	0.0247823
KEGG : 0 5223	Non-small cell lung cancer	7	0.041259	2.36555e-05	AKT1, EGFR, PIK3CG, MAPK1, MAP2K1, BRAF, RARB	82	51	7001	11.7186	0.00420188	0.000135821	0.0290794
KEGG : 0 5152	Tuberculosis	11	0.0648356	2.83739e-05	AKT1, VDR, MAPK1, CASP3, MAPK14, RHOA, CTSD, MAPK8, JAK2, MAPK10, SRC	82	174	7001	5.39746	0.00503789	0.00015782	0.0348787
KEGG : 0 4668	TNF signaling pathway	9	0.0530473	3.12595e-05	AKT1, PIK3CG, MAPK1, CASP3, MAP2K1, MAPK14, MAPK8, MAPK10, MMP3	82	108	7001	7.11484	0.00554882	0.0001686	0.0384252
KEGG : 0 5221	Acute myeloid leukemia	7	0.041259	3.30007e-05	AKT1, PIK3CG, MAPK1, PPARD, MAP2K1, BRAF, RARA	82	54	7001	11.0675	0.00585699	0.000172756	0.0405651
KEGG : 0 4114	Oocyte meiosis	9	0.0530473	3.34225e-05	PGR, MAPK1, IGF1R, AR, MAP2K1, PLK1, IGF1, AURKA, CDK2	82	109	7001	7.04956	0.00593163	0.000169965	0.0410835
KEGG : 0 4071	Sphingolipid signaling pathway	9	0.0530473	4.06777e-05	AKT1, PIK3CG, MAPK1, MAP2K1, MAPK14, RHOA, CTSD, MAPK8, MAPK10	82	112	7001	6.86074	0.00721462	0.000201112	0.0499997
KEGG : 0 4810	Regulation of actin cytoskeleton	11	0.0648356	7.83042e-05	FGFR2, EGFR, PIK3CG, FGFR1, MAPK1, CDC42, MAP2K1, BRAF, RHOA, FGF1, SRC	82	196	7001	4.79163	0.013842	0.000376651	0.0962286
KEGG : 0 4664	Fc epsilon RI signaling pathway	7	0.041259	7.99226e-05	AKT1, PIK3CG, MAPK1, MAP2K1, MAPK14, MAPK8, MAPK10	82	63	7001	9.48645	0.0141261	0.000374319	0.0982164
KEGG : 0 5164	Influenza A	10	0.0589414	0.000120569	AKT1, PIK3CG, MAPK1, MAP2K1, MAPK14, MAPK8, JAK2, MAPK10, PLG, HSPA8	82	167	7001	5.11246	0.0212338	0.00055017	0.148132
KEGG : 0 4910	Insulin signaling pathway	9	0.0530473	0.000123968	AKT1, PIK3CG, MAPK1, MAP2K1, BRAF, MAPK8, MAPK10, PTPN1, INSR	82	131	7001	5.86567	0.0218259	0.000551538	0.152305
KEGG : 0 4620	Toll-like receptor signaling pathway	8	0.0471531	0.000153185	AKT1, PIK3CG, MAPK1, CTSK, MAP2K1, MAPK14, MAPK8, MAPK10	82	101	7001	6.76262	0.0269006	0.000664877	0.18817
KEGG : 0 4660	T cell receptor signaling pathway	8	0.0471531	0.000173224	AKT1, PIK3CG, MAPK1, CDC42, MAP2K1, MAPK14, RHOA, IL2	82	103	7001	6.6313	0.030366	0.000733934	0.212762
KEGG : 0 5145	Toxoplasmosis	8	0.0471531	0.000195336	AKT1, MAPK1, CASP3, MAPK14, MAPK8, JAK2, MAPK10, HSPA8	82	105	7001	6.50499	0.0341756	0.000808354	0.239892
KEGG : 0 5142	Chagas disease (American trypanosomiasis)	8	0.0471531	0.000219679	AKT1, PIK3CG, MAPK1, MAPK14, TGFBR1, MAPK8, MAPK10, IL2	82	107	7001	6.38341	0.0383524	0.000888405	0.26975
KEGG : 0 5203	Viral carcinogenesis	10	0.0589414	0.000272397	PIK3CG, MAPK1, CDC42, CASP3, RHOA, MDM2, CHEK1, CCNA2, CDK2, SRC	82	186	7001	4.59022	0.0473363	0.00107705	0.334384
KEGG : 0 4931	Insulin resistance	8	0.0471531	0.000291389	NR1H2, AKT1, PIK3CG, MAPK8, MAPK10, PTPN1, INSR, PTPN11	82	112	7001	6.09843	0.0505523	0.00112708	0.35766
KEGG : 0 4919	Thyroid hormone signaling pathway	8	0.0471531	0.000307768	AKT1, PIK3CG, MAPK1, THRA, MAP2K1, ESR1, MDM2, SRC	82	113	7001	6.04446	0.0533171	0.00116509	0.377728
KEGG : 0 5169	Epstein-Barr virus infection	8	0.0471531	0.000324879	AKT1, PIK3CG, MAPK14, MDM2, MAPK8, MAPK10, CCNA2, CDK2	82	114	7001	5.99144	0.0561971	0.00120423	0.398691
KEGG : 0 5160	Hepatitis C	8	0.0471531	0.000625516	AKT1, EGFR, PIK3CG, MAPK1, BRAF, MAPK14, MAPK8, MAPK10	82	127	7001	5.37814	0.105398	0.00227041	0.76633
KEGG : 0 4062	Chemokine signaling pathway	9	0.0530473	0.000818363	AKT1, PIK3CG, MAPK1, CDC42, MAP2K1, BRAF, RHOA, JAK2, SRC	82	173	7001	4.44163	0.135607	0.00291032	1.0015
KEGG : 0 5231	Choline metabolism in cancer	7	0.041259	0.000850879	AKT1, EGFR, PIK3CG, MAPK1, MAP2K1, MAPK8, MAPK10	82	97	7001	6.1613	0.1406	0.00296659	1.0411
KEGG : 0 5133	Pertussis	6	0.0353648	0.00148629	MAPK1, CASP3, MAPK14, RHOA, MAPK8, MAPK10	82	73	7001	7.01737	0.232607	0.00507852	1.81205
KEGG : 0 5100	Bacterial invasion of epithelial cells	6	0.0353648	0.00177945	PIK3CG, CDC42, MET, RHOA, CTNNA1, SRC	82	76	7001	6.74037	0.271688	0.00596375	2.1659
KEGG : 0 5202	Transcriptional misregulation in cancer	8	0.0471531	0.00179603	IGF1R, MET, PPARG, IGF1, MDM2, RARA, MMP3, PLAU	82	152	7001	4.49358	0.273838	0.00590806	2.18587
KEGG : 0 4670	Leukocyte transendothelial migration	7	0.041259	0.00205495	PIK3CG, CDC42, MAPK14, RHOA, CTNNA1, MMP2, PTPN11	82	115	7001	5.19692	0.306606	0.00663528	2.49734
KEGG : 0 4152	AMPK signaling pathway	7	0.041259	0.00224281	AKT1, PIK3CG, IGF1R, PPARG, IGF1, CCNA2, INSR	82	117	7001	5.10809	0.329457	0.00711152	2.72276
KEGG : 0 4621	NOD-like receptor signaling pathway	5	0.0294707	0.00237303	MAPK1, HSP90AA1, MAPK14, MAPK8, MAPK10	82	49	7001	8.71205	0.344857	0.00739188	2.87874
KEGG : 0 4930	Type II diabetes mellitus	5	0.0294707	0.00237303	PIK3CG, MAPK1, MAPK8, MAPK10, INSR	82	49	7001	8.71205	0.344857	0.00739188	2.87874
KEGG : 0 4913	Ovarian steroidogenesis	5	0.0294707	0.00275045	IGF1R, HSD17B1, IGF1, INSR, CYP19A1	82	51	7001	8.3704	0.387529	0.00841703	3.3295
KEGG : 0 5216	Thyroid cancer	4	0.0235766	0.00320223	MAPK1, MAP2K1, BRAF, PPARG	82	26	7001	13.1351	0.43499	0.0096298	3.86656
KEGG : 0 4150	mTOR signaling pathway	5	0.0294707	0.00439305	AKT1, PIK3CG, MAPK1, BRAF, IGF1	82	58	7001	7.36018	0.543281	0.0129765	5.26904
KEGG : 0 5206	MicroRNAs in cancer	9	0.0530473	0.00464913	EGFR, CASP3, MAP2K1, MET, ST14, RHOA, MDM2, ABL1, PLAU	82	228	7001	3.37019	0.563722	0.0135059	5.56817
KEGG : 0 4730	Long-term depression	5	0.0294707	0.00467168	MAPK1, IGF1R, MAP2K1, BRAF, IGF1	82	59	7001	7.23543	0.565477	0.0133537	5.59447
KEGG : 0 4144	Endocytosis	9	0.0530473	0.00556975	FGFR2, EGFR, IGF1R, CDC42, TGFBR1, RHOA, MDM2, HSPA8, SRC	82	235	7001	3.2698	0.629976	0.0156569	6.63641
KEGG : 0 4024	cAMP signaling pathway	8	0.0471531	0.00772942	AKT1, PIK3CG, MAPK1, MAP2K1, BRAF, RHOA, MAPK8, MAPK10	82	198	7001	3.44962	0.748718	0.0213497	9.09893
KEGG : 0 4750	Inflammatory mediator regulation of TRP channels	6	0.0353648	0.00805956	PIK3CG, MAPK14, IGF1, MAPK8, MAPK10, SRC	82	108	7001	4.74322	0.76317	0.0219165	9.47007
KEGG : 0 4650	Natural killer cell mediated cytotoxicity	6	0.0353648	0.00805956	PIK3CG, MAPK1, CASP3, MAP2K1, BRAF, PTPN11	82	108	7001	4.74322	0.76317	0.0219165	9.47007
KEGG : 0 4920	Adipocytokine signaling pathway	5	0.0294707	0.00898548	AKT1, MAPK8, JAK2, MAPK10, PTPN11	82	71	7001	6.01254	0.799441	0.0240492	10.5036
KEGG : 0 4115	p53 signaling pathway	5	0.0294707	0.00943187	CASP3, IGF1, MDM2, CHEK1, CDK2	82	72	7001	5.92903	0.814896	0.0248624	10.9979
KEGG : 0 4932	Non-alcoholic fatty liver disease (NAFLD)	7	0.041259	0.0102717	AKT1, PIK3CG, CDC42, CASP3, MAPK8, MAPK10, INSR	82	160	7001	3.73529	0.840836	0.0266648	11.9212
KEGG : 0 4110	Cell cycle	6	0.0353648	0.0104246	PLK1, MDM2, CHEK1, ABL1, CCNA2, CDK2	82	115	7001	4.45451	0.845154	0.0266716	12.0884
KEGG : 0 4960	Aldosterone-regulated sodium reabsorption	4	0.0235766	0.0115963	PIK3CG, MAPK1, IGF1, INSR	82	41	7001	8.32957	0.874596	0.0292246	13.3596
KEGG : 0 4360	Axon guidance	6	0.0353648	0.0119708	MAPK1, CDC42, MET, RHOA, ABL1, EPHB4	82	119	7001	4.30478	0.882774	0.0297411	13.7623
KEGG : 0 5132	Salmonella infection	5	0.0294707	0.0141093	MAPK1, CDC42, MAPK14, MAPK8, MAPK10	82	81	7001	5.27025	0.920288	0.0345198	16.0293
KEGG : 0 4666	Fc gamma R-mediated phagocytosis	5	0.0294707	0.0147051	AKT1, PIK3CG, MAPK1, CDC42, MAP2K1	82	82	7001	5.20598	0.928421	0.0354779	16.6511
KEGG : 0 4611	Platelet activation	6	0.0353648	0.0170118	AKT1, PIK3CG, MAPK1, MAPK14, RHOA, SRC	82	130	7001	3.94053	0.952837	0.0404322	19.0186
KEGG : 0 5162	Measles	6	0.0353648	0.0180593	AKT1, PIK3CG, JAK2, CDK2, HSPA8, IL2	82	132	7001	3.88082	0.96099	0.0423305	20.0732
KEGG : 0 140	Steroid hormone biosynthesis	4	0.0235766	0.0219623	STS, HSD17B1, SULT1E1, CYP19A1	82	52	7001	6.56754	0.9808	0.0506819	23.8926
KEGG : 0 4320	Dorso-ventral axis formation	3	0.0176824	0.0384999	EGFR, MAPK1, MAP2K1	82	27	7001	9.48645	0.999077	0.0867616	38.2879
KEGG : 0 4725	Cholinergic synapse	5	0.0294707	0.0392357	AKT1, PIK3CG, MAPK1, MAP2K1, JAK2	82	111	7001	3.84586	0.999195	0.0872943	38.866
KEGG : 0 4662	B cell receptor signaling pathway	4	0.0235766	0.0486448	AKT1, PIK3CG, MAPK1, MAP2K1	82	71	7001	4.81003	0.99986	0.106278	45.833

## Sheet: GO analysis
Category	GO ID	Term	Count	%	PValue	Genes	List Total	Pop Hits	Pop Total	Fold Enrichment	Bonferroni	Benjamini	FDR
BP	GO:0042127	regulation of cell proliferation	10	0.0589518	1.71814e-07	FGFR2, PTK2, BRAF, CHEK1, JAK2, CSK, ABL1, PLAU, SRC	83	119	11368	11.5096	0.000152559	0.000152559	0.000267349
	GO:0006351	transcription, DNA-templated	13	0.0766374	1.01851e-06	PGR, VDR, AR, ESRRA, PPARD, THRA, RXRA, PPARG, ESR1, RARA, ESR2, NR3C1, RARB	83	290	11368	6.13976	0.000904025	0.000452115	0.00158483
	GO:0038083	peptidyl-tyrosine autophosphorylation	6	0.0353711	1.23041e-06	PTK2, JAK2, CSK, ABL1, SRC	83	27	11368	30.4364	0.00109201	0.000364136	0.00191456
	GO:0007169	transmembrane receptor protein tyrosine kinase signaling pathway	7	0.0412663	1.27768e-06	EGFR, IGF1R, MET, JAK2, CSK, ABL1, INSR	83	49	11368	19.5663	0.00113393	0.000283604	0.0019881
	GO:0007173	epidermal growth factor receptor signaling pathway	5	0.0294759	3.8894e-05	PTK2, ABL1, SRC, PTPN11	83	27	11368	25.3637	0.0339489	0.00688391	0.0605036
	GO:0030574	collagen catabolic process	4	0.0235807	4.18558e-05	CTSK, CTSB, MMP2, MMP13	83	10	11368	54.7855	0.0364864	0.00617564	0.0651095
	GO:0050790	regulation of catalytic activity	4	0.0235807	5.72523e-05	AR, HSP90AA1, CTSB, SOD2	83	11	11368	49.805	0.0495707	0.00723675	0.0890498
	GO:0035264	multicellular organism growth	6	0.0353711	5.86272e-05	FGFR2, CDC42, AR, RARA, RARB, PTPN11	83	58	11368	14.1687	0.0507305	0.00648668	0.0911875
	GO:0043066	negative regulation of apoptotic process	9	0.0530567	8.10193e-05	IGF1R, CASP3, PLK1, IGF1, MDM2, AURKA, RARA, GLO1, RARB	83	196	11368	6.28916	0.0694208	0.00796236	0.125995
	GO:0000122	negative regulation of transcription from RNA polymerase II promoter	11	0.064847	8.45038e-05	NR1H2, FGFR2, VDR, FGFR1, BMP2, PLK1, PPARG, MDM2, RARA, ESR2, RARB	83	315	11368	4.78286	0.0722959	0.00747616	0.131411
	GO:0070374	positive regulation of ERK1 and ERK2 cascade	7	0.0412663	0.000106683	FGFR2, BRAF, TEK, ABL1, SRC, KDR, PTPN11	83	105	11368	9.13092	0.0903898	0.00857567	0.165874
	GO:0043401	steroid hormone mediated signaling pathway	4	0.0235807	0.000189312	VDR, AR, THRA, PPARG	83	16	11368	34.241	0.154752	0.0139127	0.294172
	GO:0030154	cell differentiation	7	0.0412663	0.000232499	PPARD, PTK2, RHOA, CSK, FGF1, ABL1	83	121	11368	7.92353	0.18656	0.0157578	0.361166
	GO:0045944	positive regulation of transcription from RNA polymerase II promoter	12	0.0707422	0.000279402	FGFR2, VDR, AR, THRA, MAPK14, PPARG, IGF1, RARA, NR3C1, RARB, FGF1, IL2	83	436	11368	3.76965	0.219752	0.0175684	0.433878
	GO:0008284	positive regulation of cell proliferation	8	0.0471615	0.000391342	FGFR2, FGFR1, AR, IGF1, RARA, RARB, FGF1, CDK2	83	187	11368	5.85942	0.293605	0.0229056	0.607213
	GO:0046777	protein autophosphorylation	6	0.0353711	0.000446082	FGFR1, IGF1R, TEK, JAK2, EPHB4, KDR	83	89	11368	9.23352	0.327134	0.024459	0.691873
	GO:0060445	branching involved in salivary gland morphogenesis	3	0.0176856	0.000506809	FGFR2, FGFR1, TGM2	83	5	11368	82.1783	0.362474	0.0261325	0.785713
	GO:0003417	growth plate cartilage development	3	0.0176856	0.000506809	RARA, RARB, MMP13	83	5	11368	82.1783	0.362474	0.0261325	0.785713
	GO:0045893	positive regulation of transcription, DNA-templated	8	0.0471615	0.000519057	AR, PPARD, TGFBR1, PPARG, ESR1, ESR2, CCNA2, CDK2	83	196	11368	5.59036	0.369374	0.0252882	0.804629
	GO:0001525	angiogenesis	6	0.0353711	0.00057358	FGFR2, PIK3CG, FGFR1, GPI, MAPK14, FGF1	83	94	11368	8.74237	0.399195	0.0264587	0.888798
	GO:0001657	ureteric bud development	4	0.0235807	0.00074197	FGFR2, FGFR1, RARA, RARB	83	25	11368	21.9142	0.48269	0.0324186	1.14832
	GO:0048762	mesenchymal cell differentiation	3	0.0176856	0.00105435	FGFR2, FGFR1, TGFBR1	83	7	11368	58.6988	0.608104	0.0436273	1.62808
	GO:0060020	Bergmann glial cell differentiation	3	0.0176856	0.00139922	MAPK1, ABL1, PTPN11	83	8	11368	51.3614	0.711592	0.0549499	2.15521
	GO:0007155	cell adhesion	6	0.0353711	0.00213305	AZGP1, PTK2, RHOA, EPHB4, SRC	83	126	11368	6.52209	0.849858	0.0791355	3.26807
	GO:0003148	outflow tract septum morphogenesis	3	0.0176856	0.00271011	FGFR2, RARA, RARB	83	11	11368	37.3538	0.91017	0.0955336	4.13485
	GO:0014068	positive regulation of phosphatidylinositol 3-kinase signaling	4	0.0235807	0.0027418	PPARD, TEK, IGF1, KDR	83	39	11368	14.0476	0.91267	0.0929182	4.18225
	GO:0060324	face development	3	0.0176856	0.00323694	MAPK1, BRAF, RARA	83	12	11368	34.241	0.943813	0.104823	4.91984
	GO:0045184	establishment of protein localization	3	0.0176856	0.00323694	PLK1, MDM2, ABL1	83	12	11368	34.241	0.943813	0.104823	4.91984
	GO:0045429	positive regulation of nitric oxide biosynthetic process	3	0.0176856	0.0044215	HSP90AA1, ESR1, SOD2	83	14	11368	29.3494	0.980454	0.135618	6.66294
	GO:0060045	positive regulation of cardiac muscle cell proliferation	3	0.0176856	0.0044215	FGFR2, FGFR1, MAPK14	83	14	11368	29.3494	0.980454	0.135618	6.66294
	GO:0046677	response to antibiotic	3	0.0176856	0.00507794	HSP90AA1, MDM2, JAK2	83	15	11368	27.3928	0.989119	0.149094	7.61598
	GO:0007229	integrin-mediated signaling pathway	4	0.0235807	0.00555546	PTK2, SRC, PTPN11	83	50	11368	10.9571	0.992895	0.15683	8.30354
	GO:2000352	negative regulation of endothelial cell apoptotic process	3	0.0176856	0.006516	BRAF, ABL1, KDR	83	17	11368	24.1701	0.996988	0.175934	9.67207
	GO:0045087	innate immune response	6	0.0353711	0.00725666	PTK2, JAK2, CSK, ABL1, SRC	83	168	11368	4.89157	0.998447	0.188301	10.7143
	GO:0040014	regulation of multicellular organism growth	3	0.0176856	0.00729638	FGFR2, IGF1, PTPN11	83	18	11368	22.8273	0.998501	0.183899	10.7698
	GO:0030878	thyroid gland development	3	0.0176856	0.00897676	MAPK1, THRA, BRAF	83	20	11368	20.5446	0.999667	0.215452	13.0914
	GO:0030218	erythrocyte differentiation	3	0.0176856	0.0138479	CASP3, THRA, JAK2	83	25	11368	16.4357	0.999996	0.305249	19.5058
	GO:0031648	protein destabilization	3	0.0176856	0.0138479	PLK1, MDM2, SRC	83	25	11368	16.4357	0.999996	0.305249	19.5058
	GO:0043124	negative regulation of I-kappaB kinase/NF-kappaB signaling	3	0.0176856	0.0138479	ESR1, RHOA, ABL1	83	25	11368	16.4357	0.999996	0.305249	19.5058
	GO:0035791	platelet-derived growth factor receptor-beta signaling pathway	2	0.0117904	0.0143751	PTPN1, ABL1	83	2	11368	136.964	0.999997	0.307442	20.1728
	GO:2001237	negative regulation of extrinsic apoptotic signaling pathway	3	0.0176856	0.0160522	AR, IGF1, SRC	83	27	11368	15.2182	0.999999	0.329121	22.2604
	GO:0034446	substrate adhesion-dependent cell spreading	3	0.0176856	0.0172069	TEK, ABL1, SRC	83	28	11368	14.6747	1	0.34069	23.668
	GO:0050679	positive regulation of epithelial cell proliferation	3	0.0176856	0.018396	FGFR2, IGF1, FGF1	83	29	11368	14.1687	1	0.352016	25.0924
	GO:0018105	peptidyl-serine phosphorylation	4	0.0235807	0.020627	MAPK1, PLK1, MAPK14, CDK2	83	81	11368	6.76365	1	0.377849	27.6982
	GO:0002068	glandular epithelial cell development	2	0.0117904	0.0214859	RARA, RARB	83	3	11368	91.3092	1	0.382567	28.6785
	GO:0055012	ventricular cardiac muscle cell differentiation	2	0.0117904	0.0214859	RARA, RARB	83	3	11368	91.3092	1	0.382567	28.6785
	GO:0048538	thymus development	3	0.0176856	0.0248374	MAPK1, BRAF, ABL1	83	34	11368	12.085	1	0.420004	32.3864
	GO:0000187	activation of MAPK activity	3	0.0176856	0.0276356	IGF1, FGF1, PTPN11	83	36	11368	11.4137	1	0.447069	35.3431
	GO:0034332	adherens junction organization	2	0.0117904	0.028546	CDC42, CSK	83	4	11368	68.4819	1	0.450136	36.2786
	GO:0010887	negative regulation of cholesterol storage	2	0.0117904	0.028546	NR1H2, PPARG	83	4	11368	68.4819	1	0.450136	36.2786
	GO:0006975	DNA damage induced protein phosphorylation	2	0.0117904	0.028546	CHEK1, ABL1	83	4	11368	68.4819	1	0.450136	36.2786
	GO:0002741	positive regulation of cytokine secretion involved in immune response	2	0.0117904	0.028546	PTK2	83	4	11368	68.4819	1	0.450136	36.2786
	GO:0060267	positive regulation of respiratory burst	2	0.0117904	0.028546	PTK2	83	4	11368	68.4819	1	0.450136	36.2786
	GO:0051603	proteolysis involved in cellular protein catabolic process	3	0.0176856	0.0290802	CTSK, FAP, CTSB	83	37	11368	11.1052	1	0.448765	36.8217
	GO:0006935	chemotaxis	3	0.0176856	0.0320578	PIK3CG, PTK2	83	39	11368	10.5357	1	0.474271	39.7703
	GO:0000902	cell morphogenesis	3	0.0176856	0.0335899	VDR, MAPK14, RHOA	83	40	11368	10.2723	1	0.482927	41.2367
	GO:0032436	positive regulation of proteasomal ubiquitin-dependent protein catabolic process	3	0.0176856	0.0351501	PLK1, MDM2, AURKA	83	41	11368	10.0217	1	0.491386	42.6957
	GO:0006508	proteolysis	4	0.0235807	0.0354894	CASP3, CTSD, PLG, PLAU	83	100	11368	5.47855	1	0.487517	43.0085
	GO:0048011	neurotrophin TRK receptor signaling pathway	2	0.0117904	0.0355557	CASP3, PTPN11	83	5	11368	54.7855	1	0.481125	43.0694
	GO:0010863	positive regulation of phospholipase C activity	2	0.0117904	0.0355557	FGFR1, ESR1	83	5	11368	54.7855	1	0.481125	43.0694
	GO:0060501	positive regulation of epithelial cell proliferation involved in lung morphogenesis	2	0.0117904	0.0355557	FGFR2, CDC42	83	5	11368	54.7855	1	0.481125	43.0694
	GO:0043568	positive regulation of insulin-like growth factor receptor signaling pathway	2	0.0117904	0.0355557	AR, IGF1	83	5	11368	54.7855	1	0.481125	43.0694
	GO:0042770	signal transduction in response to DNA damage	2	0.0117904	0.0355557	MAPK14, ABL1	83	5	11368	54.7855	1	0.481125	43.0694
	GO:0000212	meiotic spindle organization	2	0.0117904	0.0425156	RHOA, AURKA	83	6	11368	45.6546	1	0.537726	49.137
	GO:0043304	regulation of mast cell degranulation	2	0.0117904	0.0425156	PTK2	83	6	11368	45.6546	1	0.537726	49.137
	GO:0042473	outer ear morphogenesis	2	0.0117904	0.0425156	FGFR1, MAPK1	83	6	11368	45.6546	1	0.537726	49.137
	GO:0043297	apical junction assembly	2	0.0117904	0.0494258	RHOA, CTNNA1	83	7	11368	39.1325	1	0.586288	54.5584
	GO:0030520	intracellular estrogen receptor signaling pathway	2	0.0117904	0.0494258	ESR2, SRC	83	7	11368	39.1325	1	0.586288	54.5584
	GO:0001759	organ induction	2	0.0117904	0.0494258	FGFR1, FGF1	83	7	11368	39.1325	1	0.586288	54.5584
	GO:0090136	epithelial cell-cell adhesion	2	0.0117904	0.0494258	CDC42, CTNNA1	83	7	11368	39.1325	1	0.586288	54.5584
	GO:0042730	fibrinolysis	2	0.0117904	0.0494258	PLG, PLAU	83	7	11368	39.1325	1	0.586288	54.5584
CC	GO:0031234	extrinsic component of cytoplasmic side of plasma membrane	7	0.041259	2.0745e-07	PTK2, RHOA, JAK2, CSK, ABL1, SRC	87	39	12833	26.4754	2.57235e-05	2.57235e-05	0.000239552
	GO:0005615	extracellular space	15	0.0884121	0.000503792	BMP2, IGF1, PRDX5, CHEK1, SPARC, MMP2, GPI, AZGP1, CTSK, FAP, CTSD, CTSB, FGF1, PLAU, IL2	87	762	12833	2.90366	0.0605737	0.0307599	0.580207
	GO:0051233	spindle midzone	3	0.0176824	0.00121079	CDC42, PLK1, AURKA	87	8	12833	55.3147	0.139489	0.0488432	1.38926
	GO:0005634	nucleus	26	0.153248	0.0021294	FGFR2, PPARD, THRA, PPARG, PRDX5, NR3C1, SRC, PGR, AKT1, NR1H2, AZGP1, CASP3, RHOA, RARB, FGF1, AR, ESRRA, HSP90AA1, RXRA, ESRRG, ESR1, ESR2, PTPN11, MDM2, MTAP, JAK2	87	2096	12833	1.82975	0.232278	0.0639458	2.43149
	GO:0005829	cytosol	13	0.0766238	0.00290323	THRA, PRDX5, CTNNA1, SRC, CDC42, MAPK1, CASP3, MAPK14, TGM2, RHOA, ABL1, FGF1, PPP5C	87	718	12833	2.67072	0.30269	0.0695667	3.30163
	GO:0031012	extracellular matrix	5	0.0294707	0.0031003	MMP7, MMP3, MMP2, MMP13, MMP12	87	90	12833	8.19476	0.319572	0.0621566	3.52209
	GO:0005925	focal adhesion	7	0.041259	0.00461932	CDC42, FAP, TGM2, RHOA, ANXA5, CTNNA1, PLAU	87	232	12833	4.4506	0.436801	0.0787442	5.20608
	GO:0070062	extracellular exosome	19	0.111989	0.0169198	MMP7, PRDX5, ANXA5, EPHB4, SRC, AZGP1, GPI, CDC42, MAPK1, MAPK14, ST14, TGM2, RHOA, MTAP, GLO1, CTSB, CSK, NQO1, PLAU	87	1590	12833	1.76265	0.879489	0.232412	17.8853
	GO:0005739	mitochondrion	11	0.0648356	0.0175376	MAPK1, BRAF, MAPK14, TGM2, RHOA, PRDX5, ESR2, NR3C1, CTSB, PARP1, MMP2	87	695	12833	2.33462	0.888525	0.216334	18.4791
	GO:0042470	melanosome	3	0.0176824	0.0280193	HSP90AA1, CTSD, CTSB	87	39	12833	11.3466	0.970519	0.297001	27.976
	GO:0005654	nucleoplasm	12	0.0707297	0.0425599	VDR, MAPK1, GPI, HSD17B1, MAPK14, CHEK1, NR3C1, RARB, FGF1, ABL1, CCNA2, PPP5C	87	919	12833	1.92608	0.995452	0.387542	39.4816
	GO:0005764	lysosome	4	0.0235766	0.0438043	CTSK, CTSD, CTSB, SRC	87	117	12833	5.04293	0.996129	0.370518	40.3837
MF	GO:0003707	steroid hormone receptor activity	12	0.0707297	1.57989e-13	PGR, NR1H2, VDR, ESRRA, PPARD, THRA, RXRA, PPARG, ESRRG, RARA, NR3C1, RARB	89	51	11048	29.2082	2.68574e-11	2.68574e-11	1.92735e-10
	GO:0005524	ATP binding	28	0.165036	6.1416e-09	FGFR2, FGFR1, CHEK1, AURKA, EPHB4, SRC, AKT1, IGF1R, TEK, CSK, INSR, EGFR, PIK3CG, HSP90AA1, MAP2K1, BRAF, TGFBR1, MET, MAPK10, CDK2, KDR, MAPK1, PLK1, MAPK14, JAK2, MAPK8, ABL1, PPP5C	89	992	11048	3.50381	1.04407e-06	5.22036e-07	7.49265e-06
	GO:0008270	zinc ion binding	23	0.135565	1.64109e-07	AR, ESRRA, PPARD, THRA, RXRA, PPARG, ESR1, ESRRG, MMP7, ESR2, NR3C1, MMP3, MMP13, MMP2, MMP12, PGR, NR1H2, VDR, MDM2, GLO1, RARA, PTPN1, PARP1	89	793	11048	3.60038	2.78981e-05	9.29946e-06	0.00020021
	GO:0005496	steroid binding	6	0.0353648	3.0444e-07	PGR, AR, ESRRA, ESR1, ESR2, NR3C1	89	19	11048	39.2005	5.17535e-05	1.29386e-05	0.000371412
	GO:0004715	non-membrane spanning protein tyrosine kinase activity	6	0.0353648	5.6917e-06	PTK2, JAK2, CSK, ABL1, SRC	89	33	11048	22.57	0.000967123	0.0001935	0.00694355
	GO:0004707	MAP kinase activity	4	0.0235766	3.96255e-05	MAPK1, MAPK14, MAPK8, MAPK10	89	9	11048	55.171	0.00671383	0.00112212	0.0483317
	GO:0043565	sequence-specific DNA binding	11	0.0648356	5.94669e-05	PGR, VDR, AR, ESRRA, PPARD, THRA, RXRA, PPARG, ESR1, ESR2, NR3C1	89	273	11048	5.00177	0.0100587	0.0014432	0.0725244
	GO:0004714	transmembrane receptor protein tyrosine kinase activity	4	0.0235766	0.000207331	EGFR, IGF1R, MET, INSR	89	15	11048	33.1026	0.0346359	0.00439655	0.252647
	GO:0004879	RNA polymerase II transcription factor activity, ligand-activated sequence-specific DNA binding	4	0.0235766	0.000585451	NR1H2, AR, PPARD, PPARG	89	21	11048	23.6447	0.0947606	0.0110008	0.711904
	GO:0005518	collagen binding	3	0.0176824	0.00329264	CTSK, SPARC, CTSB	89	11	11048	33.855	0.429175	0.0545244	3.94372
	GO:0004222	metalloendopeptidase activity	5	0.0294707	0.0064041	MMP7, MMP3, MMP2, MMP13, MMP12	89	93	11048	6.67392	0.664522	0.0945206	7.53872
	GO:0004674	protein serine/threonine kinase activity	6	0.0353648	0.0140263	AKT1, PIK3CG, MAP2K1, BRAF, PLK1, AURKA	89	179	11048	4.16094	0.909404	0.181361	15.8298
	GO:0004252	serine-type endopeptidase activity	5	0.0294707	0.0140873	FAP, ST14, MMP2, PLG, PLAU	89	117	11048	5.30491	0.910352	0.169335	15.8934
	GO:0051022	Rho GDP-dissociation inhibitor binding	2	0.0117883	0.0158678	CDC42, RHOA	89	2	11048	124.135	0.934069	0.176527	17.7277
	GO:0008144	drug binding	3	0.0176824	0.0221539	PPARD, DHFR, PPARG	89	29	11048	12.8415	0.977819	0.224231	23.9145
	GO:0003708	retinoic acid receptor activity	2	0.0117883	0.023708	RARA, RARB	89	3	11048	82.7566	0.983074	0.225031	25.3767
	GO:0001077	transcriptional activator activity, RNA polymerase II core promoter proximal region sequence-specific binding	5	0.0294707	0.0254055	PGR, NR1H2, AR, ESRRA, NR3C1	89	140	11048	4.43339	0.987409	0.226893	26.9443
	GO:0046965	retinoid X receptor binding	2	0.0117883	0.0314865	VDR, PPARG	89	4	11048	62.0674	0.995655	0.260777	32.3152
	GO:0005007	fibroblast growth factor-activated receptor activity	2	0.0117883	0.0314865	FGFR2, FGFR1	89	4	11048	62.0674	0.995655	0.260777	32.3152
	GO:0030284	estrogen receptor activity	2	0.0117883	0.0392038	ESR1, ESR2	89	5	11048	49.6539	0.998885	0.300809	38.609
	GO:0003700	transcription factor activity, sequence-specific DNA binding	8	0.0471531	0.0428182	PGR, AR, ESRRA, RXRA, PPARG, ESR1, ESR2, NR3C1	89	406	11048	2.44601	0.999412	0.31063	41.368
	GO:0043394	proteoglycan binding	2	0.0117883	0.0468602	CTSK, CTSB	89	6	11048	41.3783	0.999714	0.321941	44.3181
